# Supplementary material for: A novel risk model of three gefitinib-related genes FBP1, SBK1 and AURKA is related to the immune microenvironment and is predicting prognosis of lung adenocarcinoma patients
Source: publisher site journal article supplement (doi:10.18632/aging.205040), 2023-09-21
Supplement: Supplementary file [file aging-v15i18-205040-supplementary-material-SD2.pdf]

## SUPPLEMENTARY TABLES

**Supplementary Table 1. Functions of the DEGTGs.**

| GO | Term       | Category                                                         | Count | P        |
|----|------------|------------------------------------------------------------------|-------|----------|
| MF | GO:0005524 | ATP binding                                                      | 83    | 4.55E-86 |
| BP | GO:0046777 | Protein autophosphorylation                                      | 47    | 1.67E-71 |
| MF | GO:0004672 | Protein kinase activity                                          | 46    | 1.02E-53 |
| BP | GO:0006468 | Protein phosphorylation                                          | 47    | 1.92E-50 |
| MF | GO:0004674 | Protein serine/threonine kinase activity                         | 42    | 7.15E-46 |
| BP | GO:0018108 | Peptidyl-tyrosine phosphorylation                                | 32    | 8.93E-43 |
| MF | GO:0004713 | Protein tyrosine kinase activity                                 | 26    | 1.76E-33 |
| BP | GO:0007169 | Transmembrane receptor protein tyrosine kinase signaling pathway | 22    | 1.41E-29 |
| MF | GO:0004714 | Transmembrane receptor protein tyrosine kinase activity          | 16    | 8.76E-26 |
| BP | GO:0038083 | Peptidyl-tyrosine autophosphorylation                            | 16    | 2.44E-25 |
| MF | GO:0004715 | Non-membrane spanning protein tyrosine kinase activity           | 14    | 3.25E-20 |
| BP | GO:0043552 | Positive regulation of phosphatidylinositol 3-kinase activity    | 11    | 2.01E-16 |
| BP | GO:0035556 | Intracellular signal transduction                                | 22    | 3.37E-16 |
| CC | GO:0031234 | Extrinsic component of cytoplasmic side of plasma membrane       | 12    | 1.10E-14 |
| BP | GO:0014068 | Positive regulation of phosphatidylinositol 3-kinase signaling   | 12    | 1.57E-14 |
| MF | GO:0004716 | Receptor signaling protein tyrosine kinase activity              | 7     | 2.43E-12 |
| BP | GO:0000165 | MAPK cascade                                                     | 16    | 2.50E-12 |
| BP | GO:0043406 | Positive regulation of map kinase activity                       | 10    | 1.16E-11 |
| MF | GO:0005515 | Protein binding                                                  | 73    | 2.03E-11 |
| BP | GO:0018105 | Peptidyl-serine phosphorylation                                  | 12    | 2.55E-11 |
| MF | GO:0005088 | Ras guanyl-nucleotide exchange factor activity                   | 11    | 2.32E-10 |
| BP | GO:0010863 | Positive regulation of phospholipase C activity                  | 6     | 3.24E-10 |
| BP | GO:0001934 | Positive regulation of protein phosphorylation                   | 11    | 6.53E-10 |
| CC | GO:0005829 | Cytosol                                                          | 40    | 1.71E-09 |
| MF | GO:0016301 | Kinase activity                                                  | 13    | 2.16E-09 |
| BP | GO:0014066 | Regulation of phosphatidylinositol 3-kinase signaling            | 9     | 4.47E-09 |
| BP | GO:0007165 | Signal transduction                                              | 24    | 5.50E-09 |
| BP | GO:0048013 | Ephrin receptor signaling pathway                                | 9     | 9.80E-09 |
| MF | GO:0005021 | Vascular endothelial growth factor-activated receptor activity   | 5     | 1.88E-08 |
| BP | GO:0046854 | Phosphatidylinositol phosphorylation                             | 9     | 1.99E-08 |
| MF | GO:0046934 | Phosphatidylinositol-4,5-bisphosphate 3-kinase activity          | 8     | 2.12E-08 |
| BP | GO:0045087 | Innate immune response                                           | 15    | 2.23E-08 |
| BP | GO:0030335 | Positive regulation of cell migration                            | 11    | 2.38E-08 |
| CC | GO:0005737 | Cytoplasm                                                        | 49    | 2.58E-08 |
| BP | GO:0000187 | Activation of mapk activity                                      | 9     | 5.54E-08 |
| BP | GO:0048010 | Vascular endothelial growth factor receptor signaling pathway    | 8     | 6.33E-08 |
| CC | GO:0043235 | Receptor complex                                                 | 9     | 1.13E-07 |
| BP | GO:0043410 | Positive regulation of mapk cascade                              | 8     | 1.44E-07 |
| BP | GO:0016477 | Cell migration                                                   | 10    | 1.73E-07 |
| MF | GO:0019838 | Growth factor binding                                            | 6     | 1.89E-07 |
| BP | GO:2000145 | Regulation of cell motility                                      | 6     | 2.35E-07 |
| BP | GO:0042127 | Regulation of cell proliferation                                 | 10    | 3.21E-07 |
| BP | GO:0043066 | Negative regulation of apoptotic process                         | 14    | 3.37E-07 |
| MF | GO:0004707 | MAP kinase activity                                              | 5     | 5.24E-07 |

|    |            |                                                                  |    |          |
|----|------------|------------------------------------------------------------------|----|----------|
| MF | GO:0000287 | Magnesium ion binding                                            | 10 | 6.99E-07 |
| BP | GO:0048015 | Phosphatidylinositol-mediated signaling                          | 8  | 9.16E-07 |
| MF | GO:0005102 | Receptor binding                                                 | 12 | 1.20E-06 |
| MF | GO:0042803 | Protein homodimerization activity                                | 16 | 2.35E-06 |
| BP | GO:0070374 | Positive regulation of ERK1 and ERK2 cascade                     | 9  | 2.40E-06 |
| BP | GO:0023014 | Signal transduction by protein phosphorylation                   | 6  | 2.44E-06 |
| CC | GO:0005634 | Nucleus                                                          | 46 | 2.64E-06 |
| BP | GO:0008284 | Positive regulation of cell proliferation                        | 13 | 2.94E-06 |
| BP | GO:0035924 | Cellular response to vascular endothelial growth factor stimulus | 5  | 4.57E-06 |
| BP | GO:0008360 | Regulation of cell shape                                         | 8  | 5.90E-06 |
| MF | GO:0004702 | Receptor signaling protein serine/threonine kinase activity      | 6  | 6.07E-06 |
| CC | GO:0005886 | Plasma membrane                                                  | 38 | 7.39E-06 |
| BP | GO:0007049 | Cell cycle                                                       | 9  | 1.17E-05 |
| MF | GO:0019903 | Protein phosphatase binding                                      | 6  | 1.43E-05 |
| BP | GO:0001525 | Angiogenesis                                                     | 9  | 1.43E-05 |
| CC | GO:0005887 | Integral component of plasma membrane                            | 20 | 1.52E-05 |
| MF | GO:0042802 | Identical protein binding                                        | 15 | 1.56E-05 |
| BP | GO:0031663 | Lipopolysaccharide-mediated signaling pathway                    | 5  | 1.80E-05 |
| MF | GO:0005003 | Ephrin receptor activity                                         | 4  | 1.84E-05 |
| BP | GO:0034446 | Substrate adhesion-dependent cell spreading                      | 5  | 3.60E-05 |
| CC | GO:0045121 | Membrane raft                                                    | 8  | 4.27E-05 |
| BP | GO:0010976 | Positive regulation of neuron projection development             | 6  | 7.83E-05 |
| BP | GO:2000249 | Regulation of actin cytoskeleton reorganization                  | 4  | 9.01E-05 |
| BP | GO:0007254 | JNK cascade                                                      | 5  | 9.93E-05 |
| BP | GO:0043547 | Positive regulation of GTPase activity                           | 12 | 1.02E-04 |

Abbreviations: DEGTGs: differentially expressed gefitinib target genes; GO: gene ontology; BP: biological process; MF: molecular function; CC: cell component.

### Supplementary Table 2. Functions involved in subgroups of the DEGTGs in LUAD.

| GO | ID         | Description                                                             | P           | Count |
|----|------------|-------------------------------------------------------------------------|-------------|-------|
| BP | GO:0051883 | Killing of cells in other organism involved in symbiotic interaction    | 5.01131E-07 | 4     |
| BP | GO:0051818 | Disruption of cells of other organism involved in symbiotic interaction | 8.67793E-07 | 4     |
| BP | GO:0019730 | Antimicrobial humoral response                                          | 1.27764E-06 | 7     |
| BP | GO:0070942 | Neutrophil mediated cytotoxicity                                        | 1.03059E-05 | 3     |
| BP | GO:0001963 | Synaptic transmission, dopaminergic                                     | 1.09352E-05 | 4     |
| BP | GO:0051873 | Killing by host of symbiont cells                                       | 1.87715E-05 | 3     |
| BP | GO:0003002 | Regionalization                                                         | 2.82067E-05 | 9     |
| BP | GO:0051852 | Disruption by host of symbiont cells                                    | 3.08568E-05 | 3     |
| BP | GO:0032225 | Regulation of synaptic transmission, dopaminergic                       | 4.71641E-05 | 3     |
| BP | GO:0042035 | Regulation of cytokine biosynthetic process                             | 0.000163404 | 5     |
| BP | GO:0031640 | Killing of cells of other organism                                      | 0.000174369 | 4     |
| BP | GO:0044364 | Disruption of cells of other organism                                   | 0.000174369 | 4     |
| BP | GO:0021953 | Central nervous system neuron differentiation                           | 0.000176276 | 6     |
| BP | GO:0007389 | Pattern specification process                                           | 0.000176336 | 9     |
| BP | GO:0001505 | Regulation of neurotransmitter levels                                   | 0.000192111 | 8     |
| BP | GO:0006836 | Neurotransmitter transport                                              | 0.000209819 | 7     |
| BP | GO:0042089 | Cytokine biosynthetic process                                           | 0.000233028 | 5     |

|    |            |                                                                                              |             |   |
|----|------------|----------------------------------------------------------------------------------------------|-------------|---|
| BP | GO:0042107 | Cytokine metabolic process                                                                   | 0.000241968 | 5 |
| BP | GO:2001025 | Positive regulation of response to drug                                                      | 0.00026536  | 3 |
| BP | GO:0061844 | Antimicrobial humoral immune response mediated by antimicrobial peptide                      | 0.000327683 | 4 |
| BP | GO:0009954 | Proximal/distal pattern formation                                                            | 0.000360573 | 3 |
| BP | GO:0015893 | Drug transport                                                                               | 0.000408537 | 6 |
| BP | GO:0050829 | Defense response to Gram-negative bacterium                                                  | 0.000667059 | 4 |
| BP | GO:0050804 | Modulation of chemical synaptic transmission                                                 | 0.000767437 | 8 |
| BP | GO:0019835 | Cytolysis                                                                                    | 0.000769755 | 3 |
| BP | GO:0099177 | Regulation of trans-synaptic signaling                                                       | 0.000778925 | 8 |
| BP | GO:0021877 | Forebrain neuron fate commitment                                                             | 0.00087928  | 2 |
| BP | GO:0051583 | Dopamine uptake involved in synaptic transmission                                            | 0.001071537 | 2 |
| BP | GO:0051934 | Catecholamine uptake involved in synaptic transmission                                       | 0.001071537 | 2 |
| BP | GO:0006959 | Humoral immune response                                                                      | 0.001112298 | 7 |
| BP | GO:0023061 | Signal release                                                                               | 0.001114365 | 8 |
| BP | GO:0007631 | Feeding behavior                                                                             | 0.001117428 | 4 |
| BP | GO:0060986 | Endocrine hormone secretion                                                                  | 0.001235019 | 3 |
| BP | GO:0021903 | Rostrocaudal neural tube patterning                                                          | 0.00128209  | 2 |
| BP | GO:0015696 | Ammonium transport                                                                           | 0.001432217 | 4 |
| BP | GO:0021794 | Thalamus development                                                                         | 0.001510774 | 2 |
| BP | GO:2000052 | Positive regulation of non-canonical Wnt signaling pathway                                   | 0.001510774 | 2 |
| BP | GO:0051817 | Modification of morphology or physiology of other organism involved in symbiotic interaction | 0.001637445 | 4 |
| BP | GO:0070268 | Cornification                                                                                | 0.001637445 | 4 |
| BP | GO:0030900 | Forebrain development                                                                        | 0.001641544 | 7 |
| BP | GO:0015872 | Dopamine transport                                                                           | 0.001656262 | 3 |
| BP | GO:0021879 | Forebrain neuron differentiation                                                             | 0.001749975 | 3 |
| BP | GO:0002523 | Leukocyte migration involved in inflammatory response                                        | 0.001757427 | 2 |
| BP | GO:0032274 | Gonadotropin secretion                                                                       | 0.002021886 | 2 |
| BP | GO:0045073 | Regulation of chemokine biosynthetic process                                                 | 0.002021886 | 2 |
| BP | GO:0090494 | Dopamine uptake                                                                              | 0.002021886 | 2 |
| BP | GO:2000095 | Regulation of Wnt signaling pathway, planar cell polarity pathway                            | 0.002021886 | 2 |
| BP | GO:0042033 | Chemokine biosynthetic process                                                               | 0.002303989 | 2 |
| BP | GO:0050755 | Chemokine metabolic process                                                                  | 0.002303989 | 2 |
| BP | GO:0090493 | Catecholamine uptake                                                                         | 0.002303989 | 2 |
| BP | GO:0042268 | Regulation of cytolysis                                                                      | 0.002603576 | 2 |
| BP | GO:0060850 | Regulation of transcription involved in cell fate commitment                                 | 0.002603576 | 2 |
| BP | GO:0048857 | Neural nucleus development                                                                   | 0.002744342 | 3 |
| BP | GO:0009952 | Anterior/posterior pattern specification                                                     | 0.003091123 | 5 |
| BP | GO:0048663 | Neuron fate commitment                                                                       | 0.003139052 | 3 |
| BP | GO:0021872 | Forebrain generation of neurons                                                              | 0.003277948 | 3 |
| BP | GO:0009914 | Hormone transport                                                                            | 0.003307998 | 6 |
| BP | GO:0042108 | Positive regulation of cytokine biosynthetic process                                         | 0.003420562 | 3 |
| BP | GO:0051588 | Regulation of neurotransmitter transport                                                     | 0.003582686 | 4 |
| BP | GO:0042535 | Positive regulation of tumor necrosis factor biosynthetic process                            | 0.003605656 | 2 |
| BP | GO:0042742 | Defense response to bacterium                                                                | 0.003729911 | 6 |
| BP | GO:0051966 | Regulation of synaptic transmission, glutamatergic                                           | 0.003871012 | 3 |
| CC | GO:0042734 | Presynaptic membrane                                                                         | 7.9005E-05  | 6 |
| CC | GO:0097060 | Synaptic membrane                                                                            | 0.000641831 | 8 |
| CC | GO:0098981 | Cholinergic synapse                                                                          | 0.000846411 | 2 |

|    |            |                                                       |             |   |
|----|------------|-------------------------------------------------------|-------------|---|
| CC | GO:0098691 | Dopaminergic synapse                                  | 0.001454534 | 2 |
| CC | GO:0005892 | Acetylcholine-gated channel complex                   | 0.002507195 | 2 |
| CC | GO:0035580 | Specific granule lumen                                | 0.002600802 | 3 |
| CC | GO:0034774 | Secretory granule lumen                               | 0.00297311  | 6 |
| CC | GO:0031045 | Dense core granule                                    | 0.003134424 | 2 |
| CC | GO:0060205 | Cytoplasmic vesicle lumen                             | 0.003828253 | 6 |
| CC | GO:0031983 | Vesicle lumen                                         | 0.003883687 | 6 |
| CC | GO:0005766 | Primary lysosome                                      | 0.004933391 | 4 |
| CC | GO:0042582 | Azurophil granule                                     | 0.004933391 | 4 |
| CC | GO:0044305 | Calyx of Held                                         | 0.004987225 | 2 |
| CC | GO:0042581 | Specific granule                                      | 0.00551604  | 4 |
| CC | GO:0098793 | Presynapse                                            | 0.005995437 | 7 |
| CC | GO:0032809 | Neuronal cell body membrane                           | 0.006288323 | 2 |
| CC | GO:0044298 | Cell body membrane                                    | 0.006752734 | 2 |
| CC | GO:0035578 | Azurophil granule lumen                               | 0.007623018 | 3 |
| CC | GO:0034702 | Ion channel complex                                   | 0.010711379 | 5 |
| MF | GO:0004252 | Serine-type endopeptidase activity                    | 0.000120649 | 6 |
| MF | GO:0008236 | Serine-type peptidase activity                        | 0.000243133 | 6 |
| MF | GO:0017171 | Serine hydrolase activity                             | 0.000273314 | 6 |
| MF | GO:0005179 | Hormone activity                                      | 0.000302883 | 5 |
| MF | GO:0048018 | Receptor ligand activity                              | 0.000503435 | 9 |
| MF | GO:0004175 | Endopeptidase activity                                | 0.001022595 | 8 |
| MF | GO:0015643 | Toxic substance binding                               | 0.001219163 | 2 |
| MF | GO:0008201 | Heparin binding                                       | 0.00132645  | 5 |
| MF | GO:0022848 | Acetylcholine-gated cation-selective channel activity | 0.002618819 | 2 |

Abbreviations: DEGTGs: differentially expressed gefitinib target genes; GO: gene ontology; BP: biological process; MF: molecular function; CC: cell component; LUAD: lung adenocarcinoma.
